# Supplementary material
Source: publisher figshare collection journal article supplement (https://acs.figshare.com/ndownloader/files/17930147)
Supplement: Supplementary file 1 [file 17930147]

## Supporting Information

*for*

### **Coagulation of Iodide-containing Resorcinol Solution or Natural Water with Ferric Chloride can Produce Iodinated Coagulation Byproducts**

Shunke Ding <sup>a, b</sup> Yang Deng <sup>c</sup>, Hongwei Li <sup>a, b</sup>, Chao Fang <sup>a, b</sup>, Naiyun Gao <sup>a</sup>, Wenhai Chu <sup>a, b, \*</sup>

<sup>a</sup> State Key Laboratory of Pollution Control and Resources Reuse, International Joint Research Center for Sustainable Urban Water System, College of Environmental Science and Engineering, Tongji University, Shanghai, 200092, China

<sup>b</sup> Shanghai Institute of Pollution Control and Ecological Security, Shanghai, 200092, China

<sup>c</sup> Department of Earth and Environmental Studies, Montclair State University, Montclair, New Jersey, 07043, USA

#### **\*Corresponding author:**

Tel.: +8618721871983; fax: +86 21 65986839

E-mail address: [feedwater@126.com](mailto:feedwater@126.com) (W. Chu)

Address: Room 308, Mingjing Building, 1239 Siping Road, Shanghai, 200092, China

17 Pages

1 Text

2 Tables

10 Figures

## Contents

|                                                                                                                                                                                                                                    |           |
|------------------------------------------------------------------------------------------------------------------------------------------------------------------------------------------------------------------------------------|-----------|
| Text S1. Quantification of iodide, iodate, iodine and DBPs.                                                                                                                                                                        | Page S3-4 |
| Table S1. Water quality characteristics of three natural waters.                                                                                                                                                                   | Page S5   |
| Table S2. Characteristics of DBP standards.                                                                                                                                                                                        | Page S6   |
| Figure S1. Mass spectrum of P254 (a) obtained from GC-MS and iodine (b) obtained from NIST database.                                                                                                                               | Page S7   |
| Figure S2. Total ion chromatogram (GC-MS) of resorcinol after the reaction with ferric chloride in the presence of iodide (Reaction condition: resorcinol = 50 $\mu$ M; FeCl <sub>3</sub> = 200 $\mu$ M and iodide = 200 $\mu$ M). | Page S8   |
| Figure S3. Mass spectrum of P236 <sub>1</sub> (a) obtained from GC-EI and 2-iodoresorcinol (b), 4-iodoresorcinol (c), 5-iodoresorcinol (d) obtained from NIST database.                                                            | Page S9   |
| Figure S4. Mass spectrum of P236 <sub>2</sub> (a) obtained from GC-EI and 2-iodoresorcinol (b), 4-iodoresorcinol (c), 5-iodoresorcinol (d) obtained from NIST database.                                                            | Page S10  |
| Figure S5. Mass spectrum of P362 <sub>1</sub> (a) obtained from GC-EI and 2,6-diiodohydroquinone (b) obtained from NIST database.                                                                                                  | Page S11  |
| Figure S6. Mass spectrum of P362 <sub>2</sub> (a) obtained from GC-EI and 2,6-diiodohydroquinone (b) obtained from NIST database.                                                                                                  | Page S12  |
| Figure S7. $\sum\sigma_{o,p,m}$ calculation for determining the most probable HOI reactive sites on aromatic ring of resorcinol.                                                                                                   | Page S13  |
| Figure S8. Linear relationship between P236 <sub>1</sub> and P236 <sub>2</sub> during coagulation of resorcinol with ferric chloride.                                                                                              | Page S14  |
| Figure S9. $\sum\sigma_{o,p,m}$ calculation for determining the most probable HOI reactive sites on aromatic ring of 4-iodoresorcinol.                                                                                             | Page S15  |
| Figure S10. $\sum\sigma_{o,p,m}$ calculation for determining the most probable HOI reactive sites on aromatic ring of 2-iodoresorcinol.                                                                                            | Page S16  |
| References                                                                                                                                                                                                                         | Page S17  |

**Text S1.** Quantification of iodide, iodate, iodine and DBPs.

Iodide and iodate were analyzed using a Dionex ICS 1000 ion chromatography (Sunnyvale, USA).<sup>1</sup> Separation was achieved by a Dionex AS19-HC anion-exchange analytical column (250 × 4 mm, I.D.) coupled with a Dionex AG9-HC guard column (50 × 4.0 mm, I.D.). The detection limits for both iodide and iodate were 0.1 μM and 0.3 μM, respectively.

Analysis of HOI is available in detail elsewhere.<sup>2</sup> The samples containing HOI were quenched with phenol (200 μM) and analyzed as a summation of 2-iodo- and 4-iodophenol by Shimadzu LC-20A HPLC (Kyoto, Japan) with UV detection at 231 nm. Separation was achieved with the Waters C18 column (150 × 4 mm, 5 μm particle size, Milford, USA) using a mobile phase consisting of 70% of 10 mM phosphoric acid (pH 2.2) and 30% of methanol at a flow rate of 1.0 mL/min. The detection limit for both 2-iodophenol and 4-iodophenol was 0.05 μM for a 100 μL sample injection volume.

At pre-determined time interval, 10 mL aliquot of sample containing iodinated halomethanes (I-HMs) was quenched with ascorbic acid at the same initial iodide molar concentration and extracted with 2 mL of MTBE, and then the mixed solution was shaken for 5 min with a multi-tube vortex mixer (DMT-2500, Shanghai, China) at 2300 rpm before a 5-min settling. Lastly, 1 mL supernatant was withdrawn and analyzed by Shimadzu QP2010plus gas chromatography equipped with electron capture detection (GC/ECD, Kyoto, Japan). The column used was a RTX-5MS silica capillary column (30 m × 0.25 mm, I.D. with 0.25 μm film thickness, Restek). The GC temperature program consisted of an initial temperature of 40 °C for 10 min, ramping to 200 °C at 20 °C/min and holding for 5 min. The carrier gas was nitrogen and the flow rate was 1 mL/min. The injection port was controlled at 165 °C and the ECD detector temperature at 300 °C. The detection limits for DIM and TIM were 0.4 nM (0.1 μg/L) and 0.05 nM (0.02 μg/L), respectively.

At pre-determined time, 20 mL aliquot of sample was quenched with ascorbic acid at the same molar concentration as the initial iodide concentration and the pH of I-HAA sample was adjusted to < 0.5 with 1 mL of sulfuric acid (95%-98%), followed by the addition of 3 g of sodium sulfate and 4 mL of MTBE. The mixed solution was shaken for 5 min with a multi-tube vortex mixer at 2300 rpm before a 5-min sedimentation. Then 2 mL extracted I-HAA sample was taken and derivatized to their corresponding esters with 1 mL 10% acidic methanol (sulfuric acid/methanol (v/v) = 10%)

at 50 °C for 2 h. Cooled mixtures were neutralized with 4 mL saturated sodium bicarbonate solution, and then were shaken for 5 min and settled for 5 min. Lastly, 1 mL supernatant was withdrawn and analyzed using a Shimadzu QP2010plus GC-ECD (Kyoto, Japan). The column used was a RTX-5MS silica capillary column (30 m × 0.25 mm, I.D. with 0.25 µm film thickness, Restek). The GC temperature program consisted of an initial temperature of 34 °C for 8 min, ramping to 74 °C at 20 °C/min and holding for 1 min, and then increased to 200 °C at 50 °C/min and held for 2 min. The carrier gas was nitrogen and the flow rate was 1 mL/min. The injection port was controlled at 165 °C and the ECD temperature at 300 °C. The limits of detection for MIAA and DIAA were 2.7 nM (0.5 µg/L) and 1.0 nM (0.3 µg/L), respectively.

**Table S1.** Water quality characteristics of three natural waters.

| Parameters                                  | QCS   | HP    | HA    |
|---------------------------------------------|-------|-------|-------|
| DOC (mg/L)                                  | 5.84  | 7.48  | 5     |
| UV <sub>254</sub> (cm <sup>-1</sup> )       | 0.113 | 0.172 | 0.338 |
| SUVA (L×mg <sup>-1</sup> ×m <sup>-1</sup> ) | 1.93  | 2.23  | 6.76  |
| Iodide (µg/L)                               | ND    | ND    | ND    |
| TOX (µg/L as I)                             | 6.4   | 13.2  | ND    |

ND = Not detected.

**Table S2.** Characteristics of DBP standards.

| DBP species | CAS No.  | Chemical<br>formula            | Molecular<br>weight | Source and purity            |
|-------------|----------|--------------------------------|---------------------|------------------------------|
| DIM         | 75-11-6  | CH <sub>2</sub> I <sub>2</sub> | 267.84              | Aladdin Industrial Inc., 98% |
| TIM         | 75-47-8  | CHI <sub>3</sub>               | 393.73              | Aladdin Industrial Inc., 99% |
| MIAA        | 64-69-7  | CH <sub>2</sub> ICOOH          | 185.95              | Aladdin Industrial Inc., 98% |
| DIAA        | 598-89-0 | CHI <sub>2</sub> COOH          | 311.84              | CanSyn Chem. Corp., 99%      |

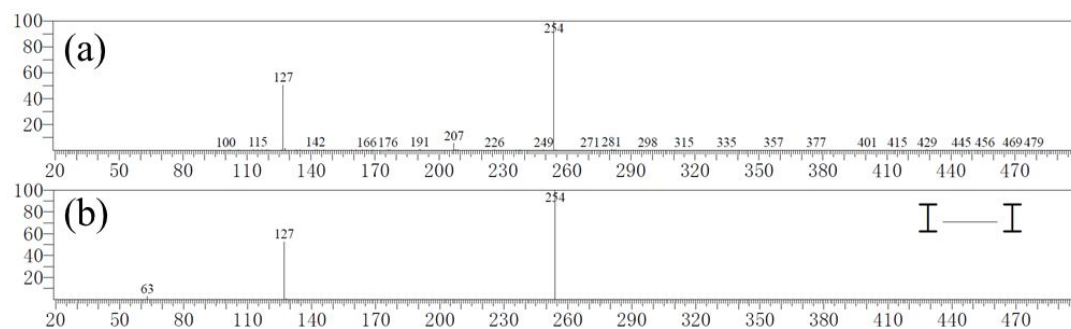

**Figure S1.** Mass spectrum of  $P_{254}$  (a) obtained from GC-MS and iodine (b) obtained from NIST database.

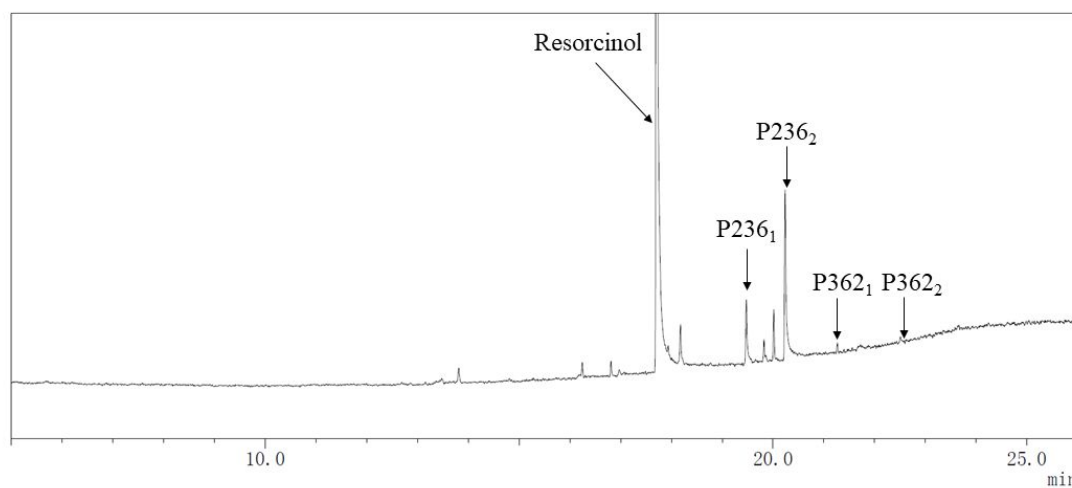

**Figure S2.** Total ion chromatogram (GC-MS) of resorcinol after the reaction with ferric chloride in the presence of iodide (Reaction condition: resorcinol = 50  $\mu\text{M}$ ;  $\text{FeCl}_3$  = 200  $\mu\text{M}$  and iodide = 200  $\mu\text{M}$ ).



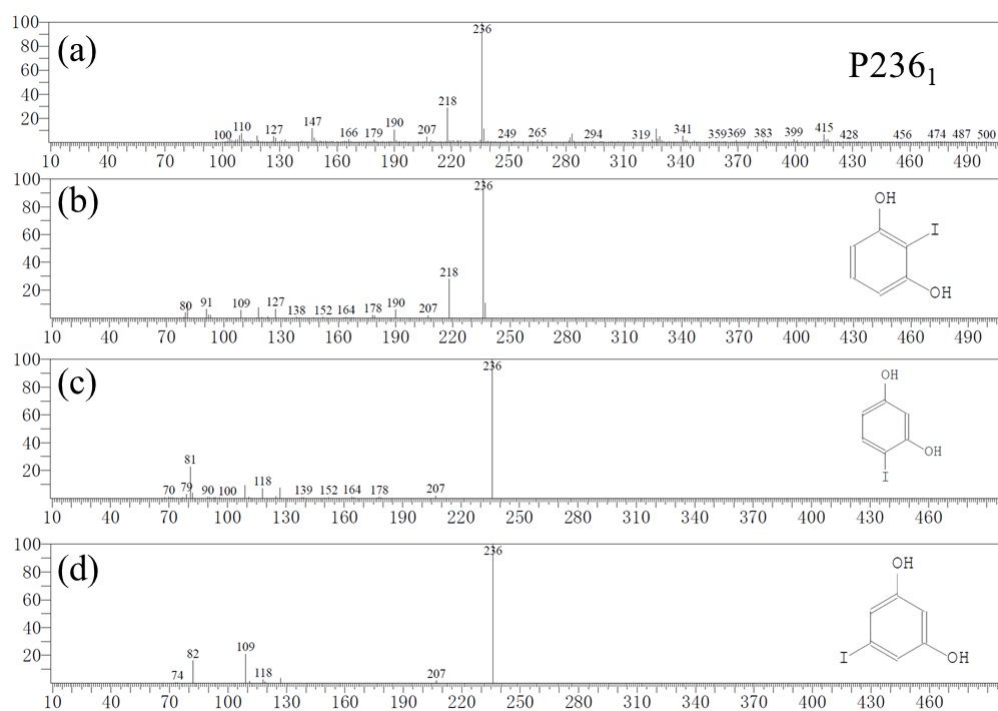

**Figure S3.** Mass spectrum of P236<sub>1</sub> (a) obtained from GC-EI and 2-iodoresorcinol (b), 4-iodoresorcinol (c), 5-iodoresorcinol (d) obtained from NIST database.

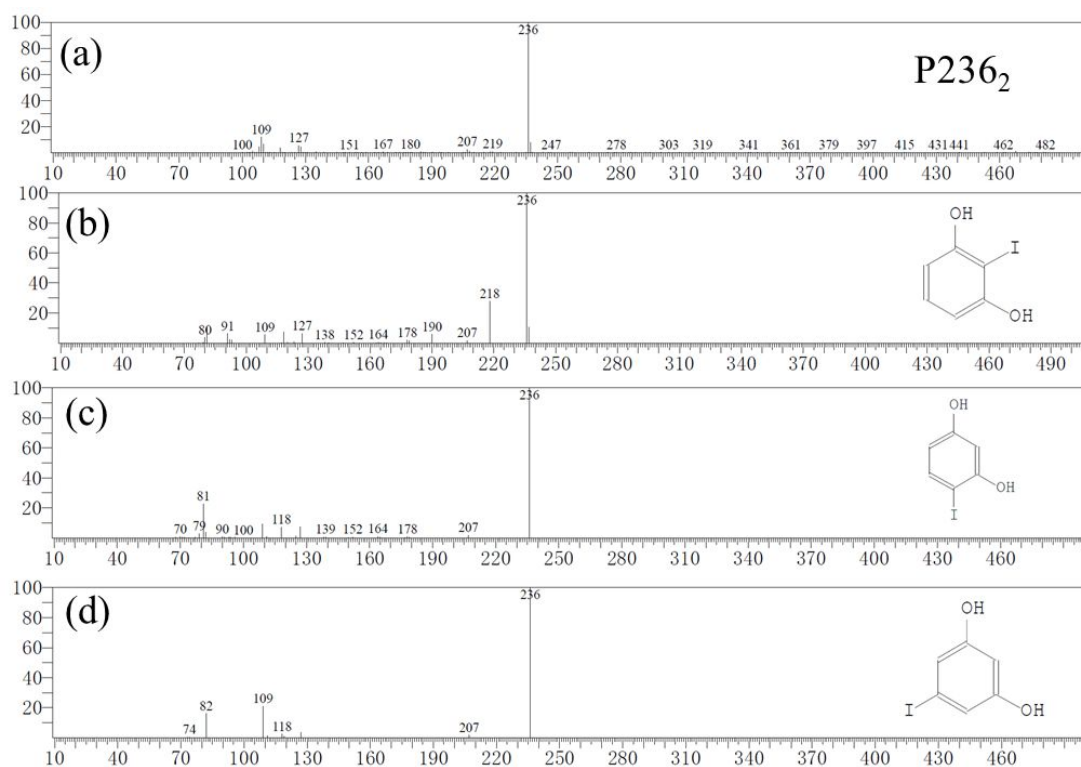

**Figure S4.** Mass spectrum of P236<sub>2</sub> (a) obtained from GC-EI and 2-iodoresorcinol (b), 4-iodoresorcinol (c), 5-iodoresorcinol (d) obtained from NIST database.

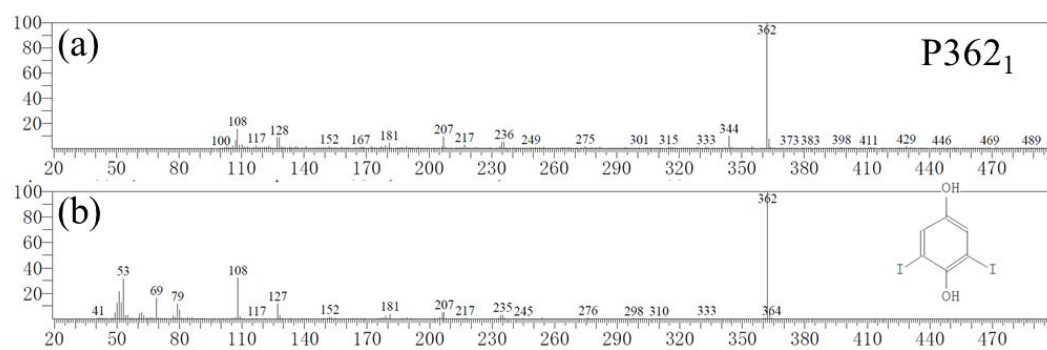

**Figure S5.** Mass spectrum of P362<sub>1</sub> (a) obtained from GC-EI and 2,6-diiodohydroquinone (b) obtained from NIST database.

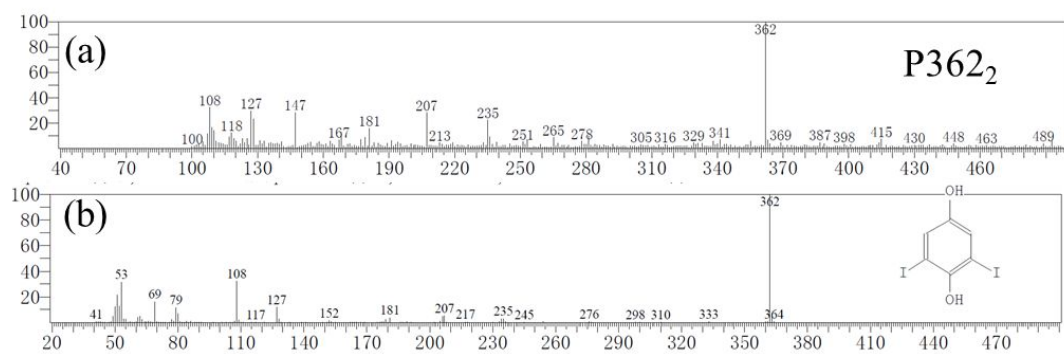

**Figure S6.** Mass spectrum of P362<sub>2</sub> (a) obtained from GC-EI and 2,6-diiodohydroquinone (b) obtained from NIST database.

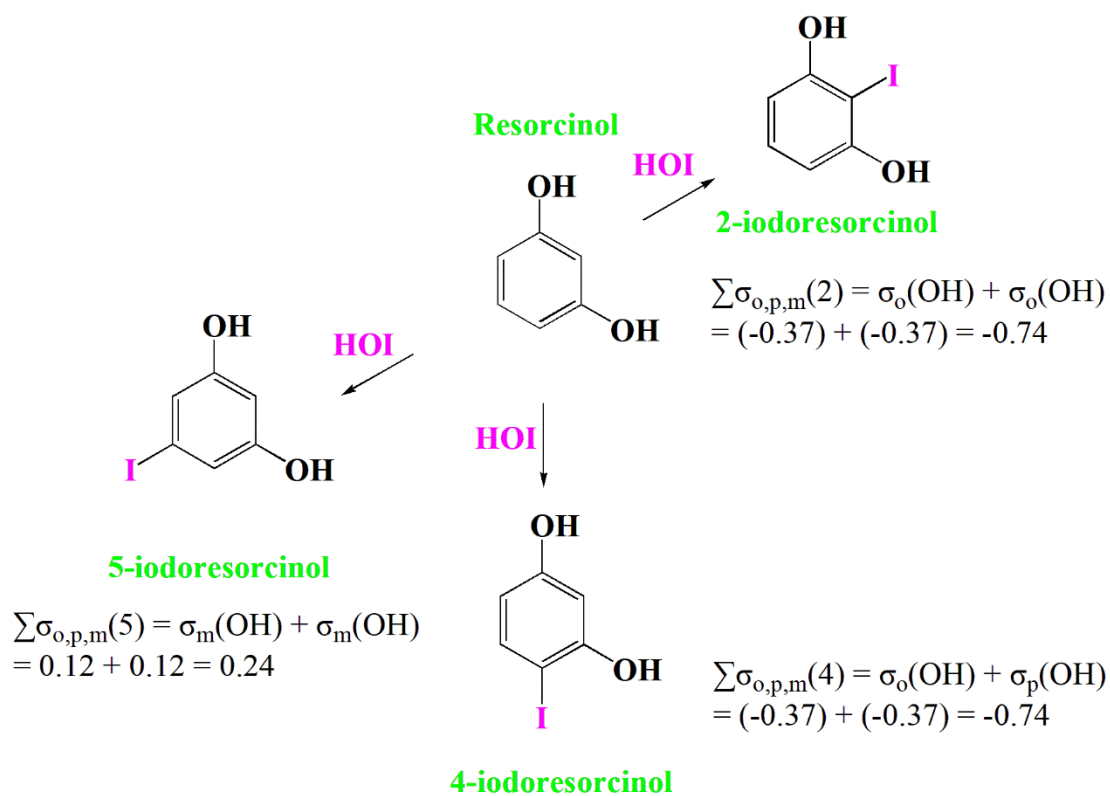

**Figure S7.**  $\Sigma\sigma_{o,p,m}$  calculation for determining the most probable HOI reactive sites on aromatic ring of resorcinol.

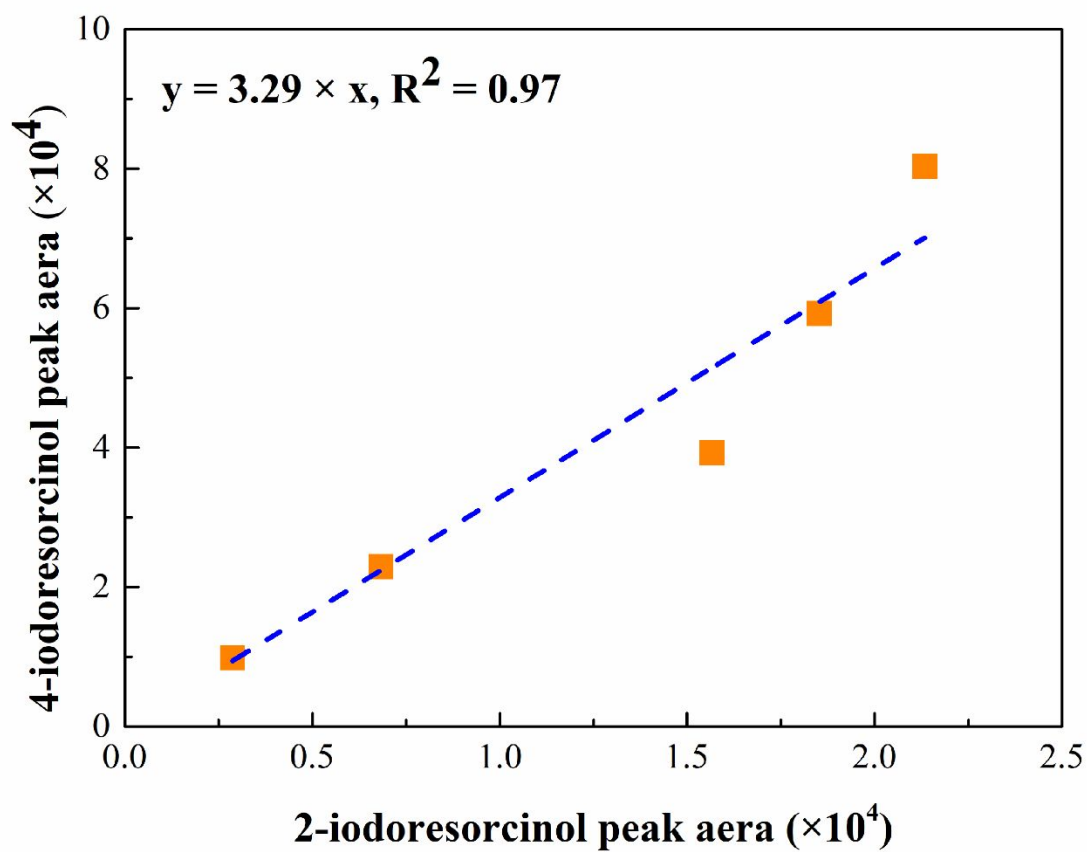

**Figure S8.** Linear relationship between P236<sub>1</sub> and P236<sub>2</sub> during coagulation of resorcinol with ferric chloride.

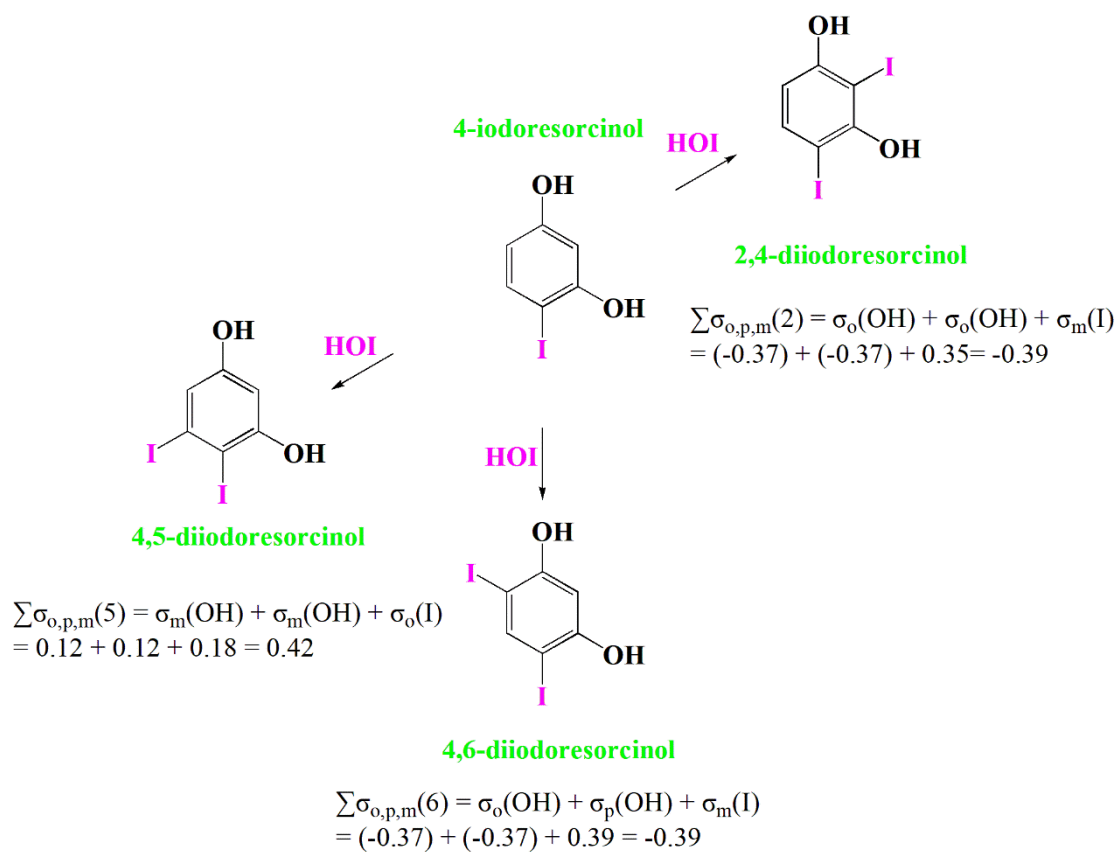

**Figure S9.**  $\sum \sigma_{o,p,m}$  calculation for determining the most probable HOI reactive sites on aromatic ring of 4-iodoresorcinol.

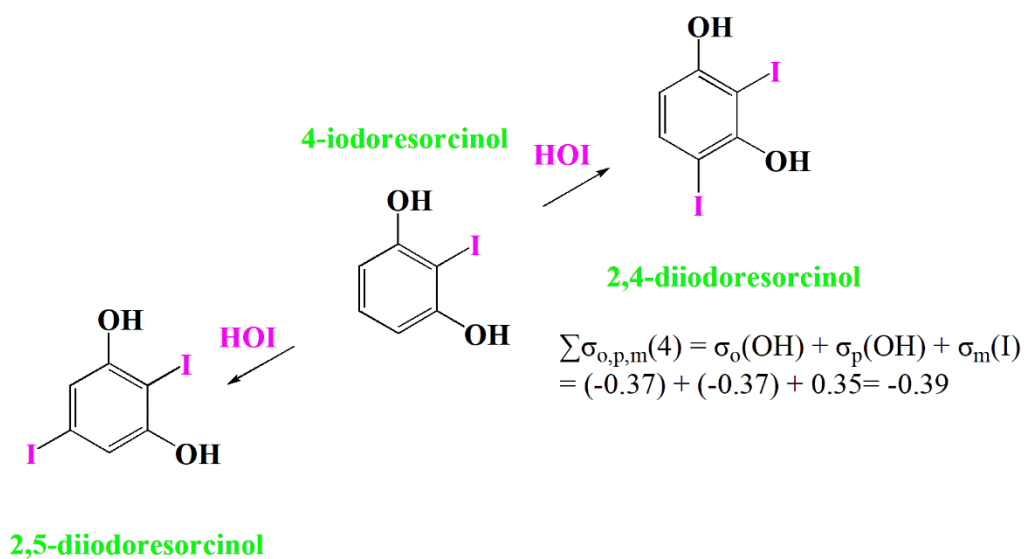

$$\sum \sigma_{o,p,m}(5) = \sigma_m(\text{OH}) + \sigma_m(\text{OH}) + \sigma_p(\text{I})$$

$$= 0.12 + 0.12 + 0.18 = 0.42$$

**Figure S10.**  $\sum \sigma_{o,p,m}$  calculation for determining the most probable HOI reactive sites on aromatic ring of 2-iodoresorcinol.



## References

- (1) Ding, S. K.; Chu, W. H.; Bond, T.; Cao, Z. Q.; Xu, B.; Gao, N. Y., Contribution of amide-based coagulant polyacrylamide as precursors of haloacetamides and other disinfection by-products. *Chem. Eng. J.* **2018**, *350*, 356-363.
- (2) Bichsel, Y.; Gunten, U. V., Formation of iodo-trihalomethanes during disinfection and oxidation of iodide-containing waters. *Environ. Sci. Technol.* **2000**, *34*, (13), 2784-2791.
